# Supplementary material for: The Epidemiology of Sudden Oak Death Disease Caused by Phytophthora ramorum in a Mixed Bay Laurel-Oak Woodland Provides Important Clues for Disease Management
Source: MDPI journal article supplement (doi:10.3390/pathogens11020250), 2022-02-15

**Supporting Table S1.**

Locations of sampling plots located within the SFPUC Peninsula watershed and associated plot data including geographical coordinates, elevation, and density of California bay laurel (*Umbellularia californica*) trees.

| Drainage/Area | Plot | Latitude    | Longitude    | Elevation (m) | Bay Density<br>(# /0.33ha) |
|---------------|------|-------------|--------------|---------------|----------------------------|
| CS            | 0    | 37.53420725 | -122.3765705 | 115           | 59                         |
| CS            | 1    | 37.47667587 | -122.3240183 | 131           | 8                          |
| CS            | 2    | 37.57758904 | -122.4122678 | 155           | 56                         |
| CS            | 3    | 37.48812832 | -122.3420616 | 107           | 39                         |
| NA            | 5    | 37.45370812 | -122.3306575 | 457           | 2                          |
| CS            | 6    | 37.54543221 | -122.4033964 | 104           | 113                        |
| CS            | 7    | 37.46138871 | -122.3038186 | 140           | 25                         |
| CS            | 8    | 37.55632374 | -122.3955187 | 113           | 299                        |
| PL            | 9    | 37.53828797 | -122.4080535 | 252           | 70                         |
| CS            | 10   | 37.56582756 | -122.4038403 | 187           | 42                         |
| PL            | 11   | 37.53001152 | -122.3908418 | 295           | 27                         |
| CS            | 12   | 37.51191507 | -122.3585746 | 95            | 51                         |
| PL            | 14   | 37.54701261 | -122.4284439 | 311           | 39                         |
| PL            | 15   | 37.52467467 | -122.3933726 | 197           | 70                         |
| CS            | 16   | 37.55031173 | -122.3838935 | 129           | 33                         |

CS=Crystal Springs drainage; PL=Pilarcitos drainage; NA=Not associated with specific drainage.

## Supporting Table S2.

Percentages of California bay laurel trees that were positives for *Phytophthora ramorum* by culturing and PCR by plot and sampling time. Data from plots 0, 8, 9, 12, 15 and 16 were used in logistic regression analysis with Aridity Index values presented in Table S3.

|         |            | EARLY 2009 |                      | PEAK 2009  |                      | LATE 2009  |                      | EARLY 2010 |                      | PEAK 2010  |                      | LATE 2010  |                      | EARLY 2011 |                      | PEAK 2011  |                      | LATE 2011  |                      | PEAK 2012  | LATE 2014  |                    |
|---------|------------|------------|----------------------|------------|----------------------|------------|----------------------|------------|----------------------|------------|----------------------|------------|----------------------|------------|----------------------|------------|----------------------|------------|----------------------|------------|------------|--------------------|
| Plot ID | # Surveyed | % Culture+ | % <i>P.ramorum</i> + | % Culture+ | % Culture+ | % <i>P.ramorum</i> |
| 0       | 28         | 3.6        | 21.4                 | 0          | 42.9                 | 0          | 46.4                 | 3.6        | 39.3                 | 7.1        | 39.3                 | 0          | 7.1                  | 46.4       | 64.3                 | 71.4       | 78.6                 | 25         | 75                   | 39.3       | 14.8       | 22.2               |
| 1       | 8          | 0          | 37.5                 | 0          | 12.5                 | 0          | 62.5                 | 0          | 12.5                 | 0          | 12.5                 | 0          | 0                    | 0          | 0                    | 62.5       | 75                   | 25         | 25                   | 62.5       | 33.3       | 50                 |
| 2       | 30         | 3.3        | 16.7                 | 23.3       | 60                   | 3.3        | 46.7                 | 30         | 70                   | 63.3       | 70                   | 53.3       | 63.3                 | 80         | 96.7                 | 83.3       | 96.7                 | 56.7       | 96.7                 | 43.3       | 23.3       | 26.7               |
| 3       | 16         | 0          | 0                    | 0          | 31.3                 | 0          | 25                   | 6.3        | 31.3                 | 0          | 18.8                 | 0          | 12.5                 | 37.5       | 43.8                 | 81.3       | 81.3                 | 62.5       | 81.3                 | 62.5       | 21.4       | 21.4               |
| 5       | 2          | 0          | 0                    | 0          | 0                    | 0          | 50                   | 0          | 0                    | 0          | 0                    | 0          | 0                    | 0          | 0                    | 0          | 0                    | 0          | 0                    | 50         | 50         | 50                 |
| 6       | 21         | 23.8       | 52.4                 | 57.1       | 85.7                 | 23.8       | 81                   | 76.2       | 100                  | 90.5       | 95.2                 | 47.6       | 76.2                 | 90.5       | 100                  | 95.2       | 100                  | 61.9       | 100                  | 47.6       | 63.6       | 72.2               |
| 7       | 19         | 10.5       | 31.6                 | 15.8       | 36.8                 | 0          | 31.6                 | 10.5       | 26.3                 | 21.1       | 36.8                 | 15.8       | 15.8                 | 26.3       | 36.8                 | 36.8       | 47.4                 | 10.5       | 26.3                 | 31.6       | 5.3        | 21                 |
| 8       | 66         | 22.7       | 50                   | 31.8       | 86.4                 | 13.6       | 69.7                 | 22.7       | 63.6                 | 69.7       | 87.9                 | 48.5       | 62.1                 | 86.4       | 89.4                 | 80.3       | 92.4                 | 59.1       | 93.9                 | 39.4       | 30         | 53.3               |
| 9       | 45         | 0          | 15.6                 | 13.3       | 28.9                 | 0          | 22.2                 | 11.1       | 28.9                 | 42.2       | 53.3                 | 2.2        | 20                   | 48.9       | 68.9                 | 66.7       | 82.2                 | 24.4       | 60                   | 91.1       | 24.4       | 34.1               |
| 10      | 28         | 10.7       | 57.1                 | 21.4       | 78.6                 | 17.9       | 78.6                 | 39.3       | 75                   | 57.1       | 89.3                 | 57.1       | 60.7                 | 82.1       | 92.9                 | 96.4       | 100                  | 78.6       | 96.4                 | 78.6       | 7.4        | 44.4               |
| 11      | 13         | 0          | 7.7                  | 0          | 7.7                  | 0          | 46.2                 | 0          | 15.4                 | 23.1       | 30.8                 | 30.8       | 38.5                 | 30.8       | 53.8                 | 38.5       | 53.8                 | 0          | 0                    | 53.8       | 7.7        | 7.7                |
| 12      | 24         | 16.7       | 41.7                 | 8.3        | 45.8                 | 8.3        | 54.2                 | 8.3        | 45.8                 | 12.5       | 54.2                 | 4.2        | 8.3                  | 4.2        | 41.7                 | 25         | 54.2                 | 12.5       | 33.3                 | 45.8       | 37.5       | 54.2               |
| 14      | 28         | 0          | 0                    | 3.6        | 17.9                 | 0          | 17.9                 | 21.4       | 57.1                 | 35.7       | 67.9                 | 28.6       | 39.3                 | 28.6       | 53.6                 | 42.9       | 71.4                 | 0          | 39.3                 | 32.1       | 15.4       | 26.9               |
| 15      | 45         | 0          | 2.2                  | 4.4        | 17.8                 | 2.2        | 13.3                 | 6.7        | 22.2                 | 33.3       | 40                   | 8.9        | 20                   | 62.2       | 84.4                 | 75.6       | 86.7                 | 40         | 73.3                 | 86.7       | 18.6       | 41.9               |
| 16      | 15         | 0          | 40                   | 0          | 66.7                 | 0          | 80                   | 0          | 13.3                 | 20         | 73.3                 | 6.7        | 13.3                 | 46.7       | 66.7                 | 80         | 86.7                 | 6.7        | 80                   | 53.3       | 0          | 20                 |

**Supporting Table S3.**

Aridity Index values in six study sites calculated for the 30 day-period before sampling times.

| <b>Plot</b> | <b>Early 2009</b> | <b>Peak 2009</b> | <b>Late 2009</b> | <b>Early 2010</b> | <b>Peak 2010</b> | <b>Late 2010</b> | <b>Early 2011</b> | <b>Peak 2011</b> | <b>Late 2011</b> |
|-------------|-------------------|------------------|------------------|-------------------|------------------|------------------|-------------------|------------------|------------------|
| <b>0</b>    | 0.52651795        | 0.27464789       | 0                | 2.43421658        | 0.73344117       | 0                | 4.23897582        | 0.7020339        | 0                |
| <b>8</b>    | 5.17389886        | 0.01033295       | 0.0654809        | 1.88161926        | 0.73636812       | 0                | 4.13483146        | 0.84438201       | 0                |
| <b>12</b>   | 4.85900358        | 0.27745665       | 0.06481439       | 2.63041905        | 0.80778114       | 0                | 2.99544304        | 0.93481378       | 0                |
| <b>9</b>    | 8.81927711        | 1.24247788       | 0.10261108       | 4.59932168        | 0.9357713        | 0.00934874       | 5.13752092        | 2.05941835       | 1.19646505       |
| <b>14</b>   | 8.81927711        | 0.80264672       | 0.09772449       | 4.67461313        | 0.12450577       | 1.42571757       | 5.71910112        | 2.14062333       | 0.02776281       |
| <b>15</b>   | 8.81927711        | 1.24247788       | 0                | 3.44358562        | 0.93700994       | 0.02900392       | 5.13602077        | 2.07264093       | 0.0291058        |

**Supporting Table S4.** Percentages of living and dead coast live oaks that were positive for *Phytophthora ramorum* by culturing in different study sites and at different sampling times.

[illegible]

**Supporting Table S5.**

Models assessing plot-level disease incidence (proportion of infected individuals) with respect to bay density and plot hotspot status, defined as containing four or more superspreader individuals that harbored active (culture-positive) *P. ramorum* infection in  $\geq 70\%$  of sampling events.

**All sampling periods, total infection**

Coefficients:

|                   | Estimate  | Std. Error | t value | Pr(> t ) |   |
|-------------------|-----------|------------|---------|----------|---|
| (Intercept)       | -0.817104 | 0.440676   | -1.854  | 0.0907   | . |
| bay_density       | 0.005762  | 0.002082   | 2.767   | 0.0183   | * |
| bay_basal_area    | 0.020989  | 0.031197   | 0.673   | 0.5150   |   |
| statusnon-hotspot | -0.252599 | 0.350846   | -0.720  | 0.4866   |   |

**All sampling periods, active (culture-positive) infection**

Coefficients:

|                   | Estimate  | Std. Error | t value | Pr(> t ) |     |
|-------------------|-----------|------------|---------|----------|-----|
| (Intercept)       | -1.569650 | 0.272398   | -5.762  | 0.000126 | *** |
| bay_density       | 0.003019  | 0.001011   | 2.986   | 0.012376 | *   |
| bay_basal_area    | 0.048596  | 0.019517   | 2.490   | 0.030039 | *   |
| statusnon-hotspot | -0.541517 | 0.222518   | -2.434  | 0.033198 | *   |

**Wettest sampling period, total infection**

Coefficients:

|                   | Estimate  | Std. Error | t value | Pr(> t ) |  |
|-------------------|-----------|------------|---------|----------|--|
| (Intercept)       | -0.672460 | 1.122963   | -0.599  | 0.561    |  |
| bay_density       | 0.015056  | 0.009706   | 1.551   | 0.149    |  |
| bay_basal_area    | 0.045254  | 0.075260   | 0.601   | 0.560    |  |
| statusnon-hotspot | -0.075388 | 0.814156   | -0.093  | 0.928    |  |

**Wettest sampling period, active (culture-positive) infection**

Coefficients:

|                   | Estimate  | Std. Error | t value | Pr(> t ) |
|-------------------|-----------|------------|---------|----------|
| (Intercept)       | -0.646582 | 0.879808   | -0.735  | 0.478    |
| bay_density       | 0.008377  | 0.005507   | 1.521   | 0.156    |
| bay_basal_area    | 0.044188  | 0.060559   | 0.730   | 0.481    |
| statusnon-hotspot | -0.185739 | 0.672978   | -0.276  | 0.788    |

**Driest sampling period, total infection**

Coefficients:

|                   | Estimate  | Std. Error | t value | Pr(> t ) |
|-------------------|-----------|------------|---------|----------|
| (Intercept)       | -0.902654 | 0.719325   | -1.255  | 0.2355   |
| bay_density       | 0.007036  | 0.003233   | 2.176   | 0.0522 . |
| bay_basal_area    | -0.041267 | 0.052131   | -0.792  | 0.4453   |
| statusnon-hotspot | 0.542877  | 0.587822   | 0.924   | 0.3755   |

**Driest sampling period, active (culture-positive) infection**

Coefficients:

|                   | Estimate  | Std. Error | t value | Pr(> t ) |
|-------------------|-----------|------------|---------|----------|
| (Intercept)       | -4.784164 | 1.650418   | -2.899  | 0.0145 * |
| bay_density       | 0.005208  | 0.003985   | 1.307   | 0.2179   |
| bay_basal_area    | 0.095617  | 0.115601   | 0.827   | 0.4257   |
| statusnon-hotspot | -0.841571 | 1.458281   | -0.577  | 0.5755   |

**Significance codes: \*\*\*0.001 \*\*0.01 \*0.**

**Supporting Figure S1.**

Proportion of individuals infected within sampling plots with respect to bay density and plot hotspot status, defined as containing four or more superspreader individuals that harbored active (culture-positive) *P. ramorum* infection in  $\geq 70\%$  of sampling events. Lines show predicted values for a tree with the median value of bay basal area across all plots. Hotspot plots are shown in red, non-hotspot plots in blue. Colored background represents the 95% confidence interval. A. Total (culture-positive or PCR-positive) infection across the entire study period. B. Active (culture-positive only) infection across the entire study period. C. Total infection during the wettest sampling event (Peak 2011). D. Active infection during the wettest sampling event. E. Total infection during the driest sampling event (Late 2009). F. Active infection during the driest sampling event.

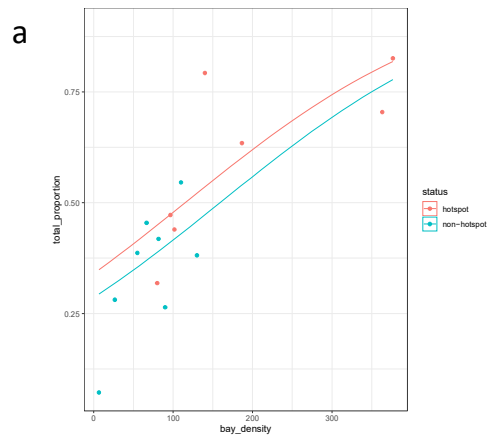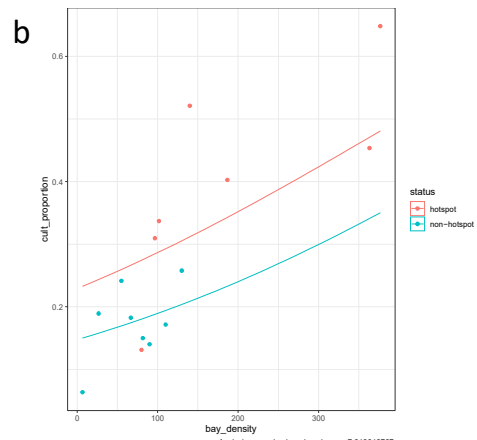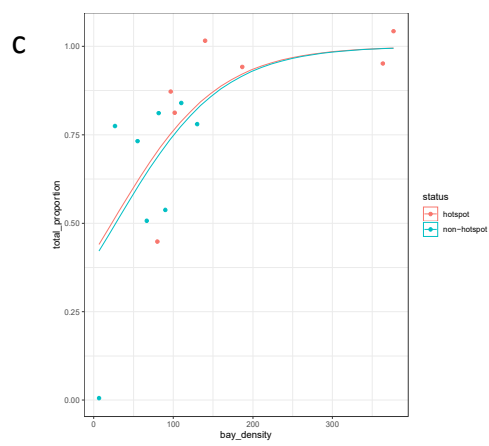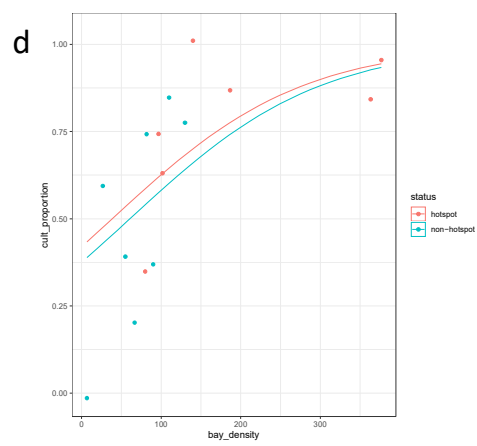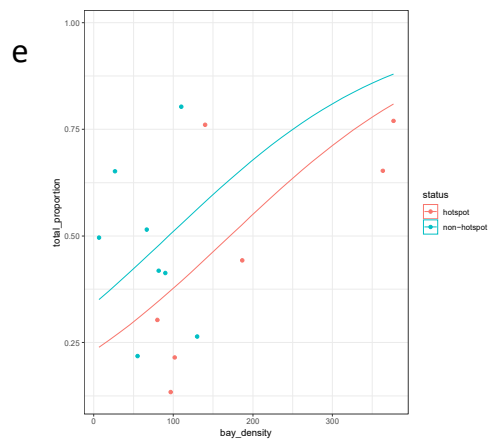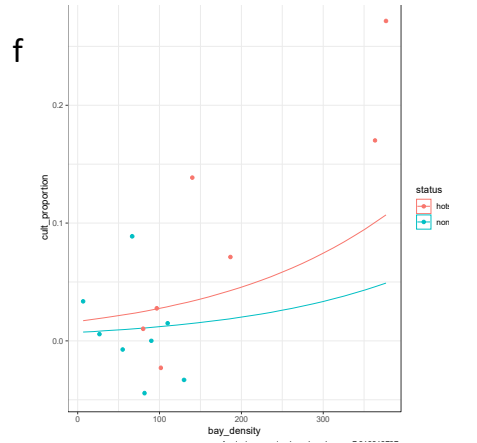

Supplement: s1 [file s1]
